# Supplementary material for: Production of Liquid Biofuel Precursors: Optimization and Regulation of Lipase Fermentation and Its Application in Plant Oil Hydrolysis Process
Source: MDPI journal article supplement (doi:10.3390/fermentation9080708), 2023-07-26
Supplement: s1 [file s1]

Archive with 1 entries (1 files):
- fermentation-2501781-supplementary.pdf
